# Supplementary material for: Does age modify the relationship between adherence to secondary prevention medications and mortality after acute myocardial infarction? A nested case-control study
Source: Springer Nature journal article supplement (doi:10.1007/s00228-014-1793-8), 2014-12-22
Supplement: MOESM1 [file 228_2014_1793_MOESM1_ESM.pdf]

**Electronic supplementary material 1:** Diagnosis codes for identification of acute myocardial infarction cases

**Article title:** Does age modify the relationship between adherence to secondary prevention medications and mortality after acute myocardial infarction? A nested case-control study

**Journal name:** European Journal of Clinical Pharmacology

**Author names:** Jacopo Lenzi, Paola Rucci, Ilaria Castaldini, Adalgisa Protonotari, Giuseppe Di Pasquale, Mirko Di Martino, Enrica Perrone, Paola Forti, Maria Pia Fantini

**Affiliation and e-mail of the corresponding author:** Alma Mater Studiorum – University of Bologna, [jacopo.lenzi2@unibo.it](mailto:jacopo.lenzi2@unibo.it)

**Table 1** ICD-9-CM codes for identification of AMI cases: primary diagnosis of AMI (410.x1) or secondary diagnosis of AMI (410.x1) associated with one of the following conditions as primary diagnosis

| ICD-9-CM code | Condition                                                                |
|---------------|--------------------------------------------------------------------------|
| 411           | Other acute and sub-acute forms of ischemic heart disease                |
| 413           | Angina pectoris                                                          |
| 414           | Other forms of chronic ischemic heart disease                            |
| 423.0         | Hemopericardium                                                          |
| 426           | Conduction disorders                                                     |
| 427           | Cardiac dysrhythmias                                                     |
| 428           | Heart failure                                                            |
| 429.5         | Rupture of chordae tendineae                                             |
| 429.6         | Rupture of papillary muscle                                              |
| 429.71        | Acquired cardiac septal defect                                           |
| 429.79        | Certain sequelae of myocardial infarction not elsewhere classified other |
| 429.81        | Other disorders of papillary muscle                                      |
| 518.4         | Acute edema of lung unspecified                                          |
| 518.81        | Acute respiratory failure                                                |
| 780.01        | Coma                                                                     |
| 780.2         | Syncope and collapse                                                     |
| 785.51        | Cardiogenic shock                                                        |
| 799.1         | Respiratory arrest                                                       |
| 997.02        | Iatrogenic cerebrovascular infarction or hemorrhage                      |
| 998.2         | Accidental puncture or laceration during a procedure                     |

*Note:* Diagnoses with a fifth digit of 1 were considered in order to include in the analysis only initial episodes of care of AMI.

*Abbreviations:* ICD-9-CM, International Classification of Diseases (Clinical Modification, 9<sup>th</sup> revision); AMI, acute myocardial infarction.
